# Supplementary material
Source: PubMed Central journal article supplement (PMC7669735)

**A****ATAC-seq**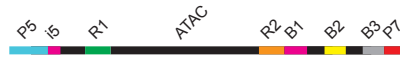**RNA-seq**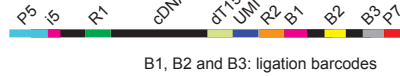

B1, B2 and B3: ligation barcodes

**B**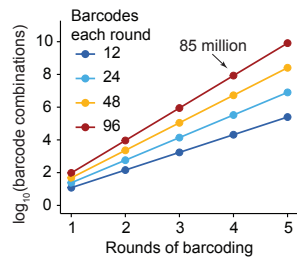**C**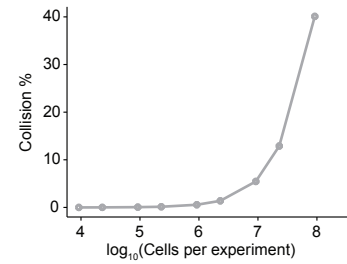**D**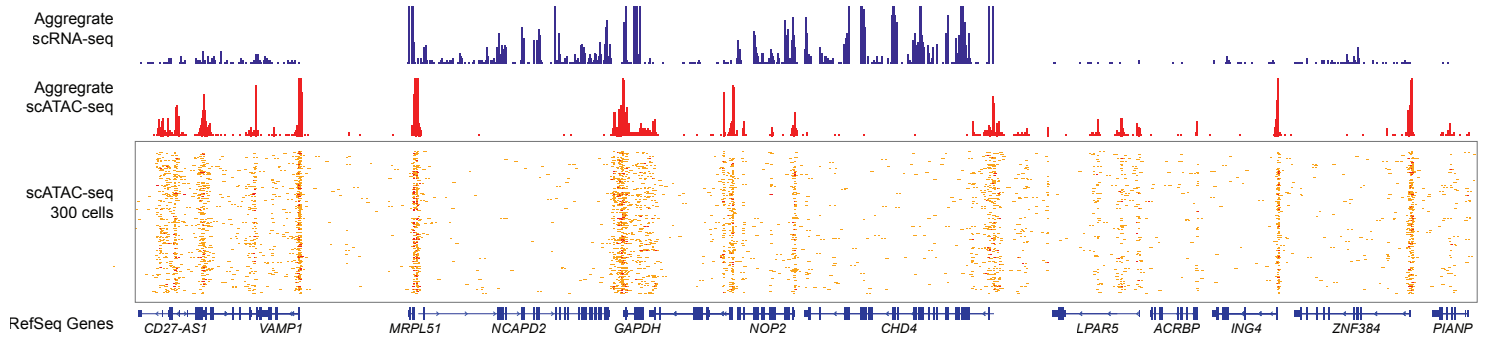**E**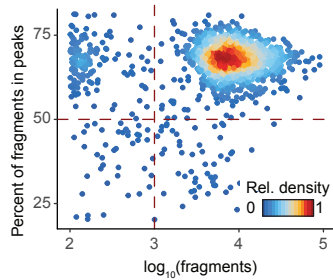**F**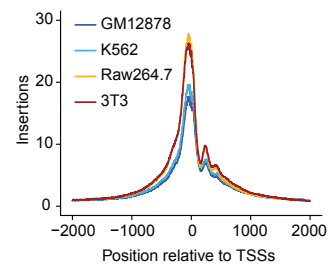**G**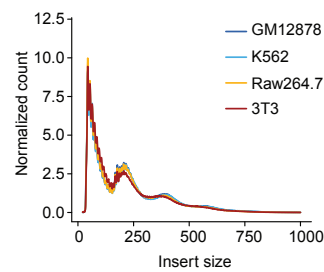**H**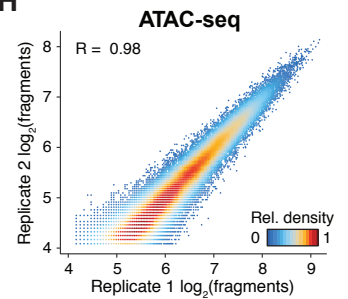**I**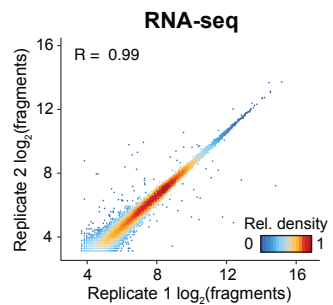**J**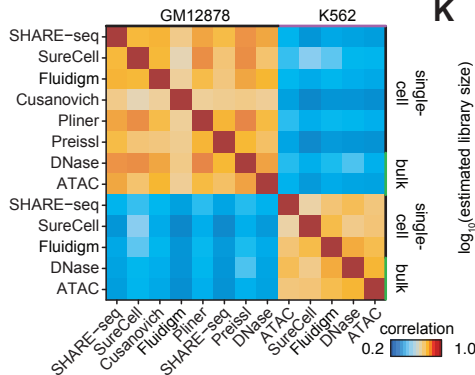**K**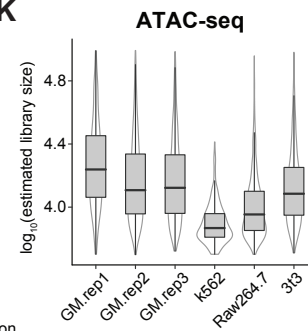**L**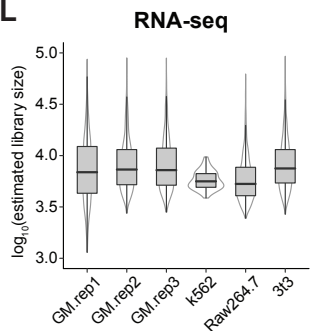**M**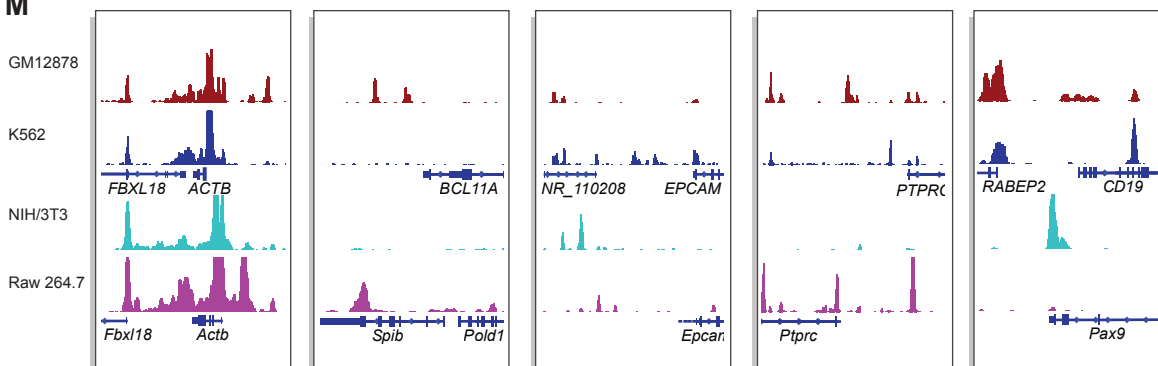**N**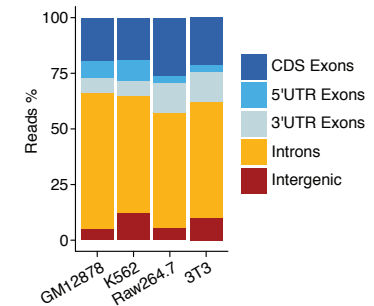

Supplement: NIHMS1632906-supplement-1.pdf [file NIHMS1632906-supplement-1.pdf]

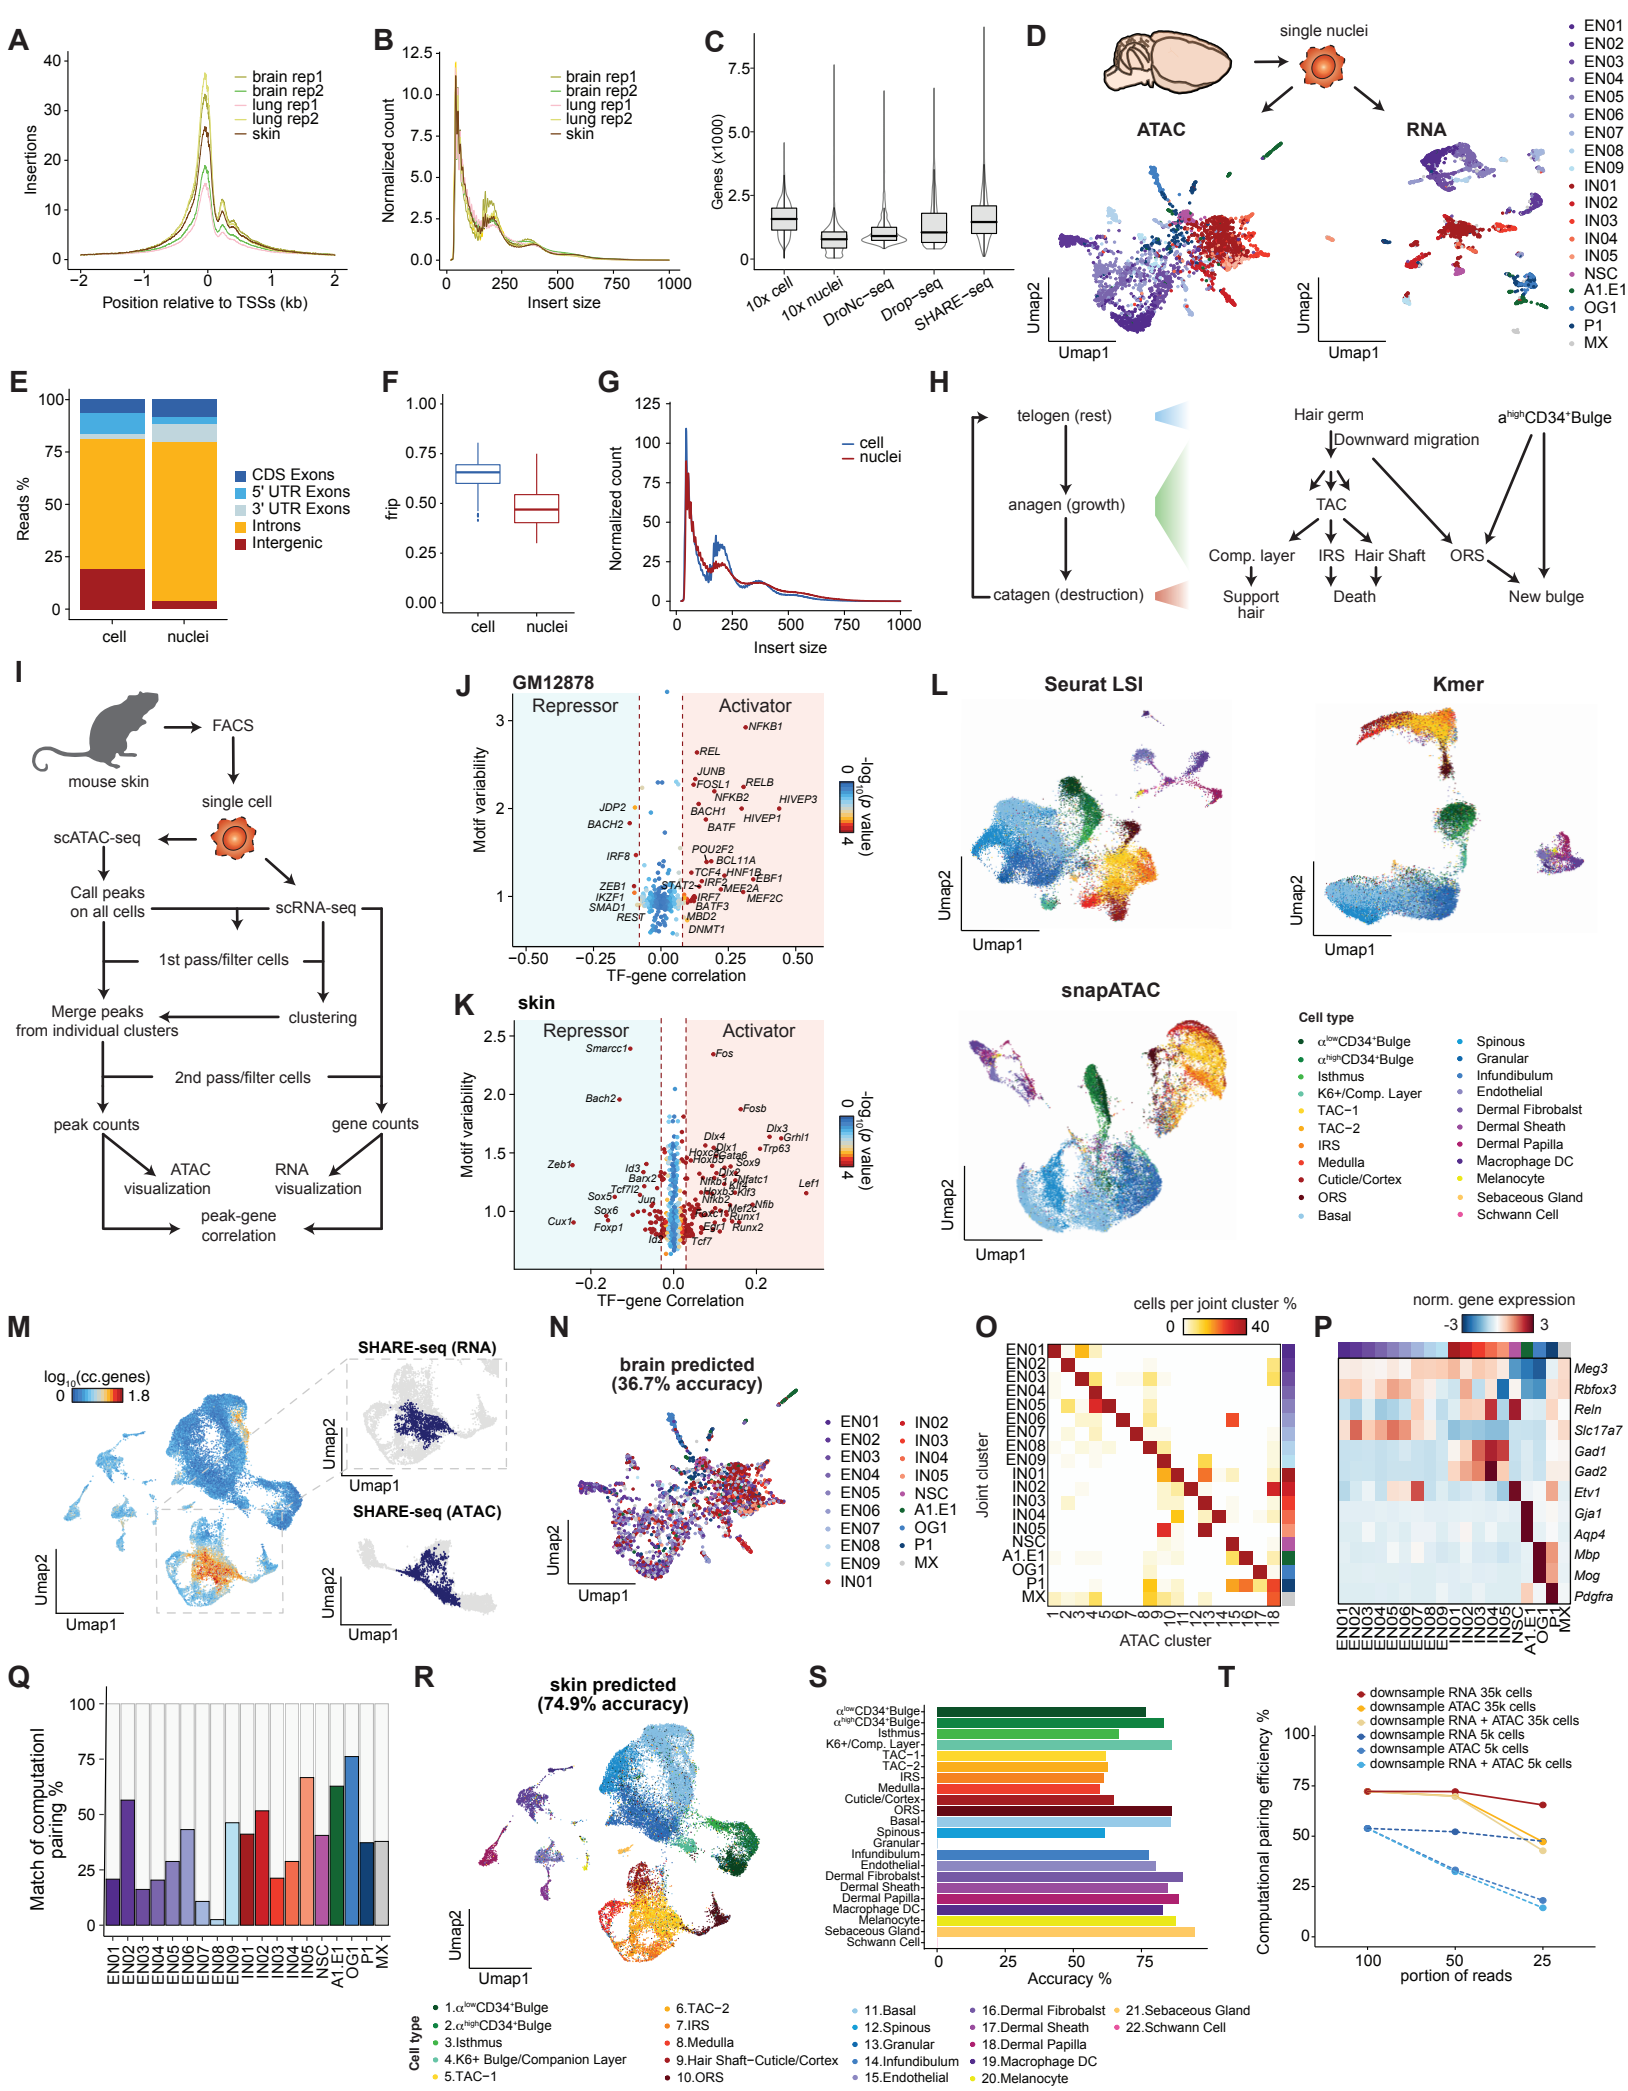

Supplement: NIHMS1632906-supplement-2.pdf [file NIHMS1632906-supplement-2.pdf]

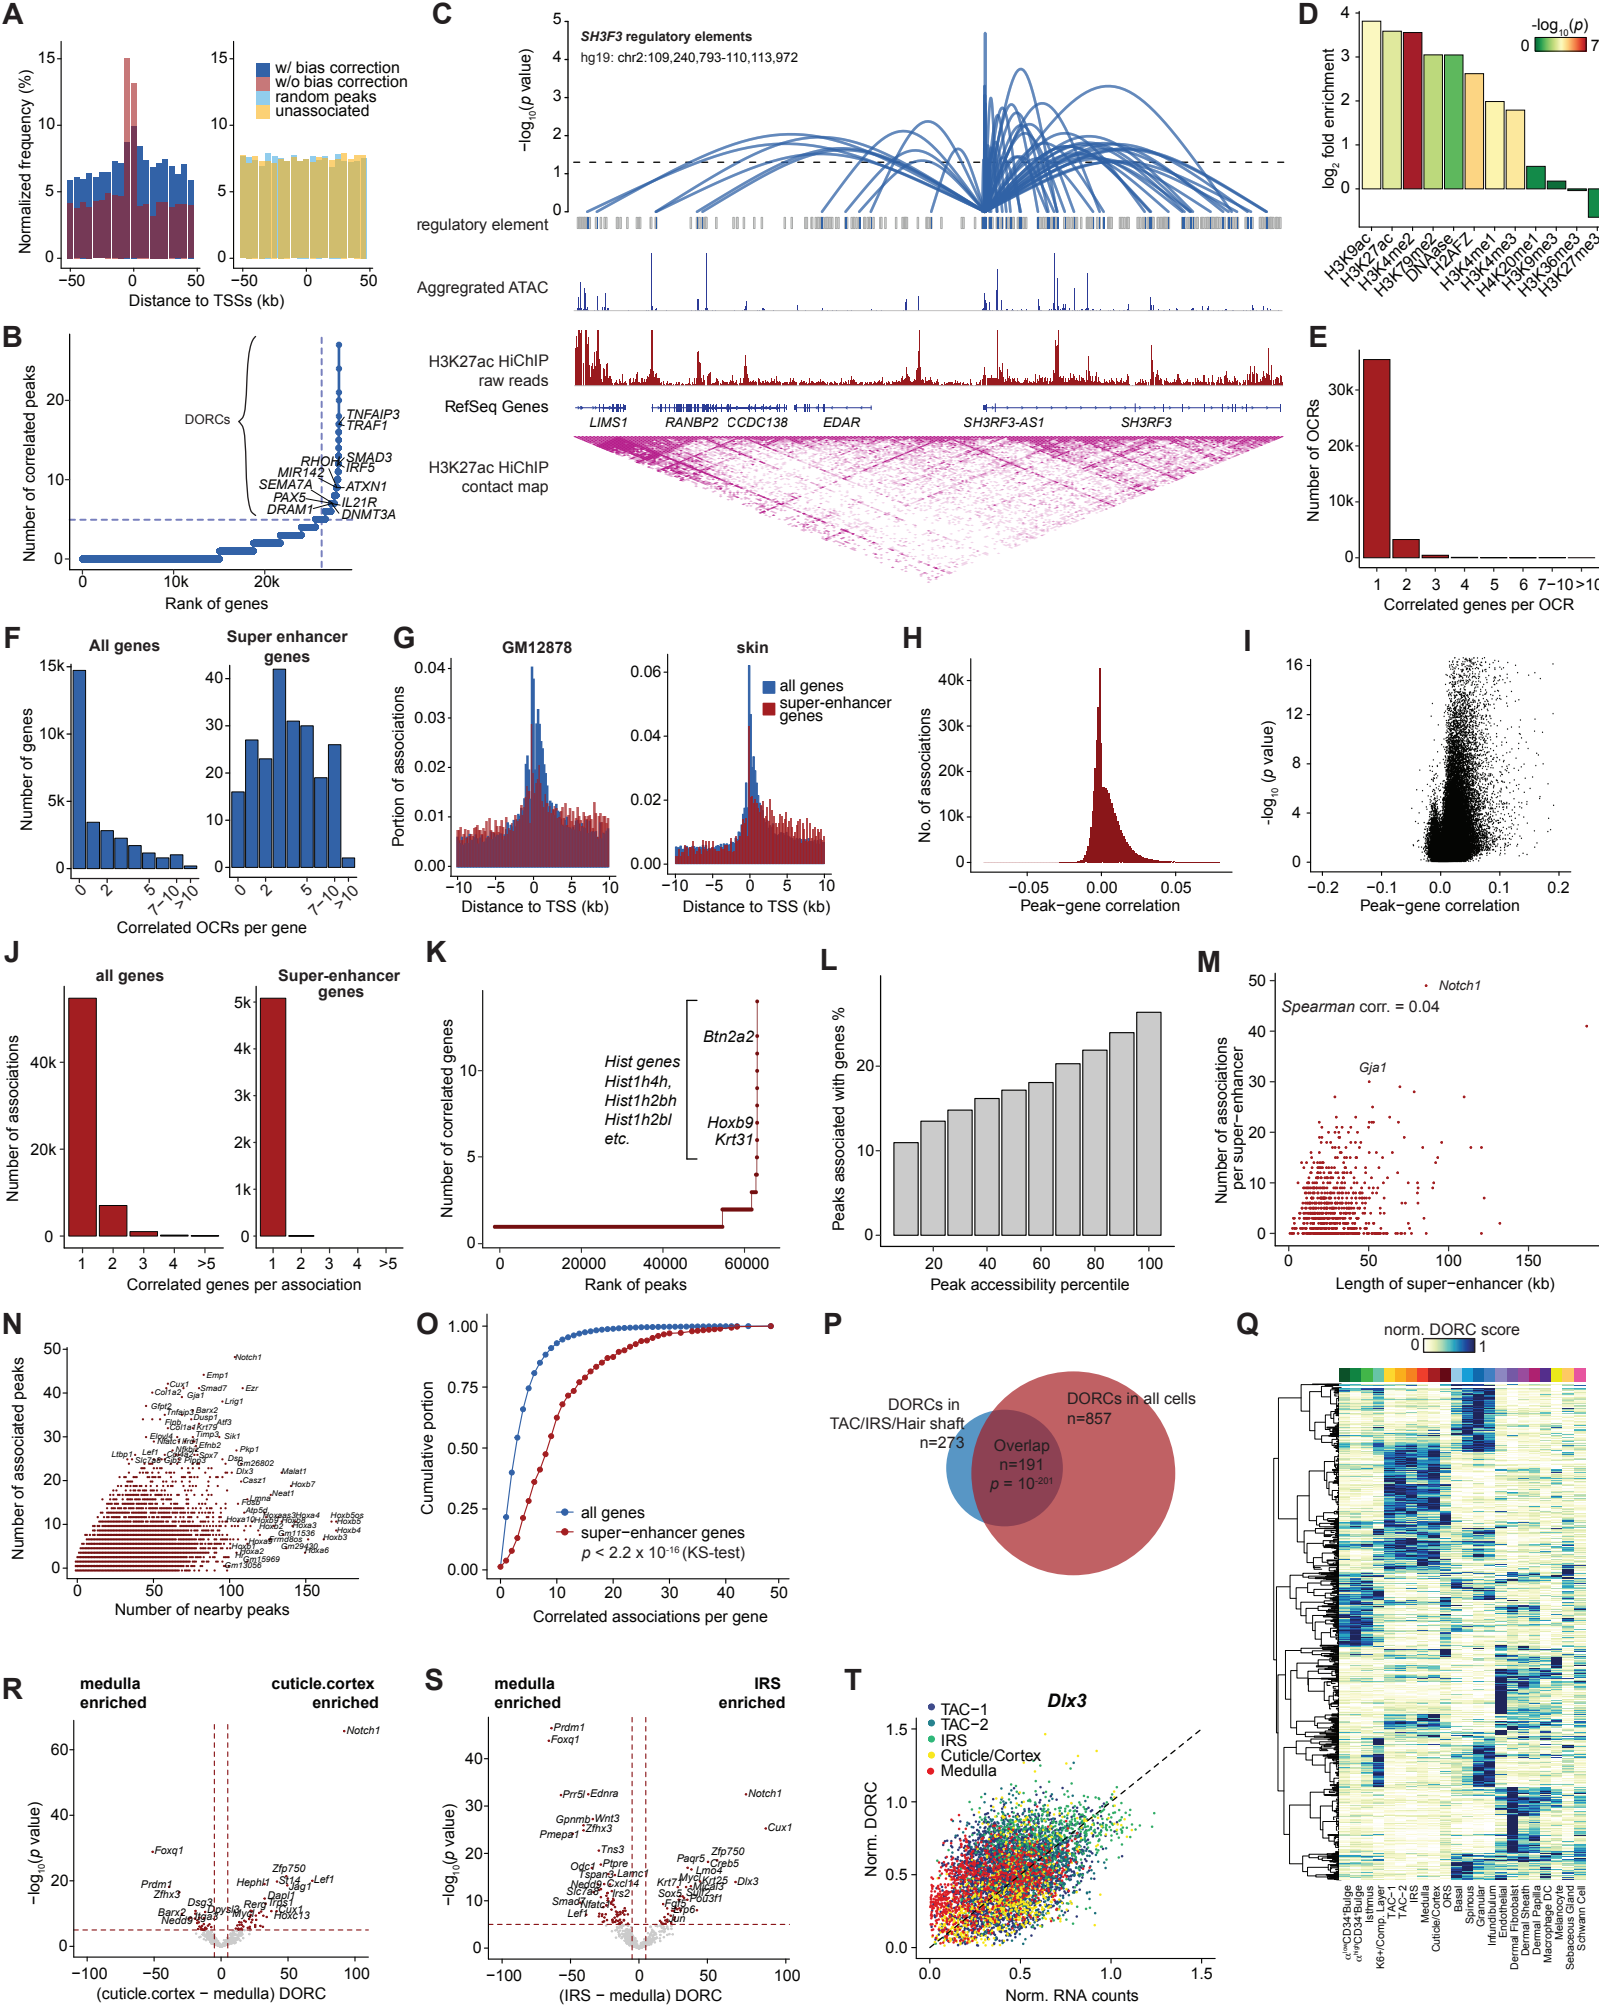

Supplement: NIHMS1632906-supplement-3.pdf [file NIHMS1632906-supplement-3.pdf]

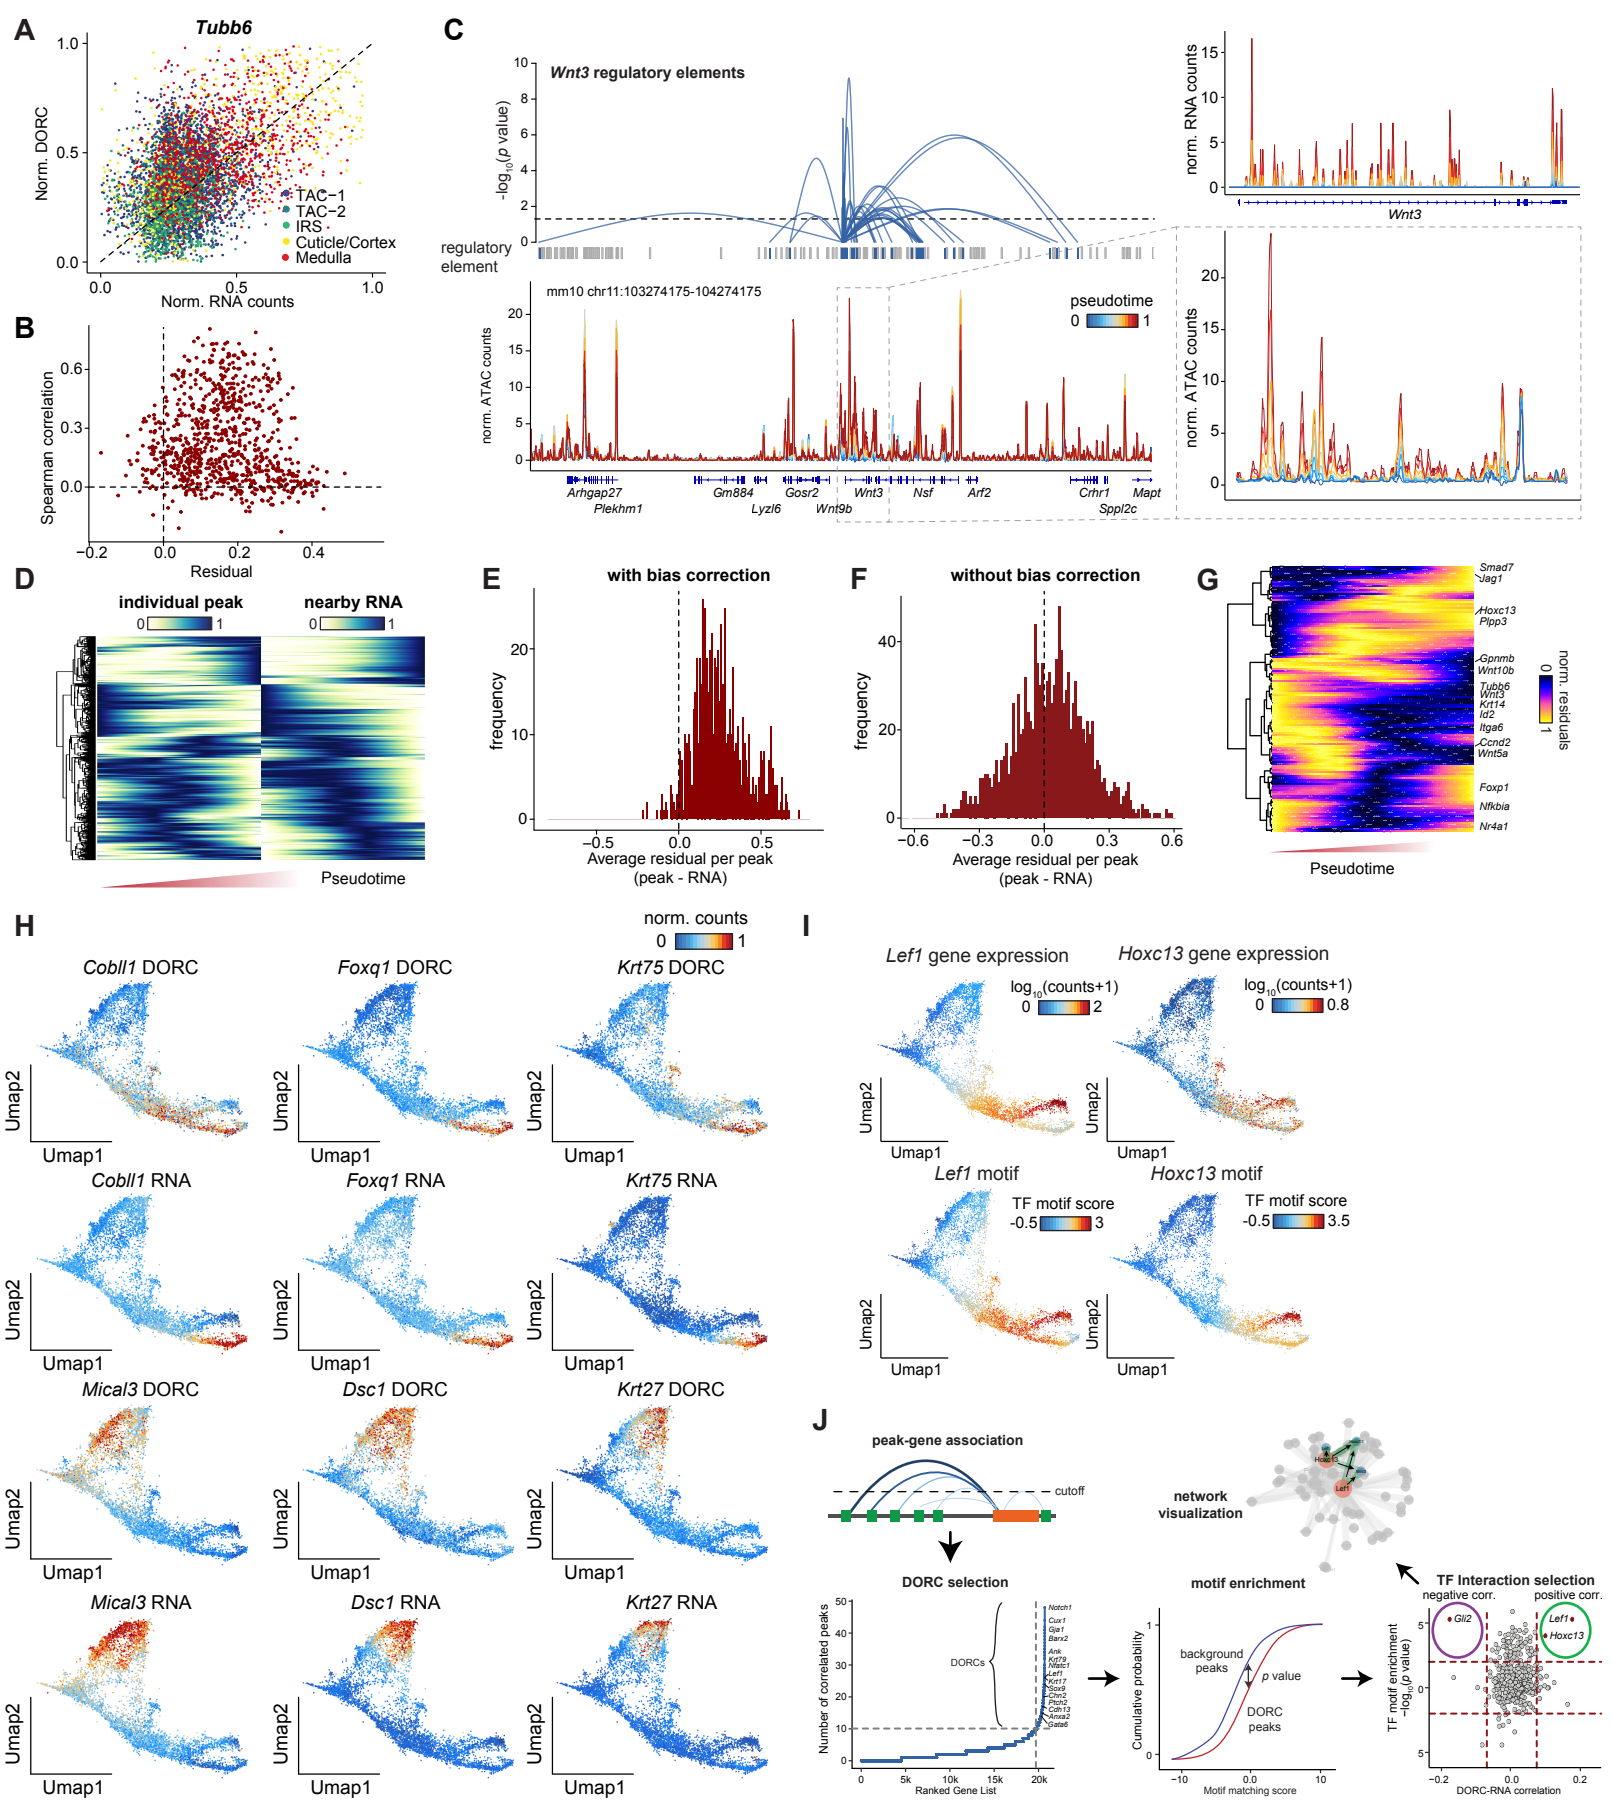

Supplement: NIHMS1632906-supplement-4.pdf [file NIHMS1632906-supplement-4.pdf]

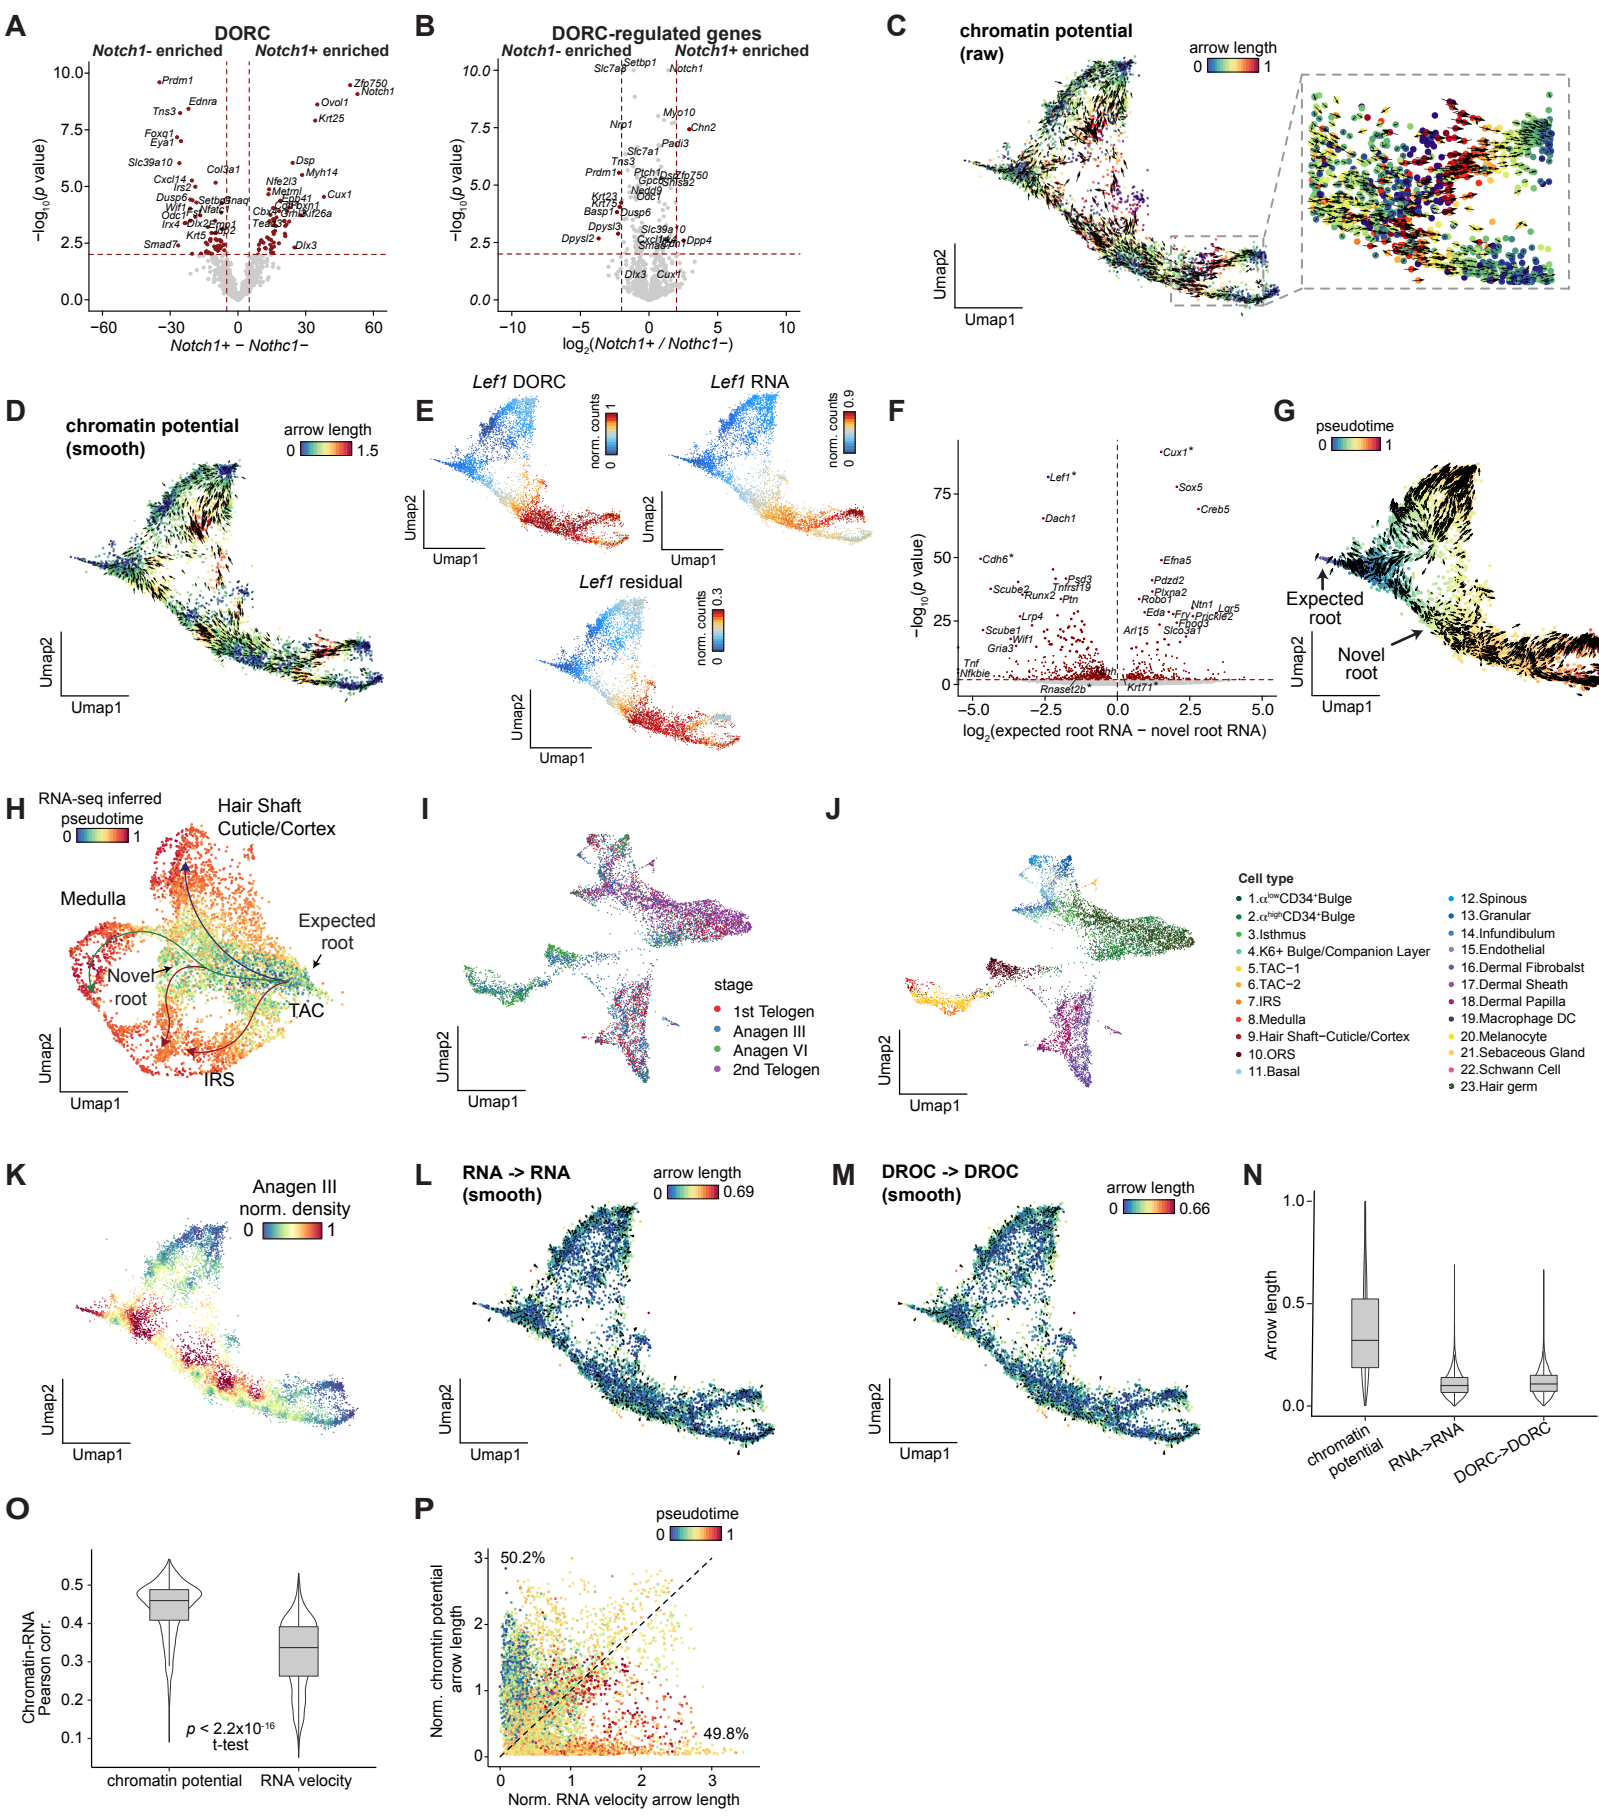

Supplement: NIHMS1632906-supplement-5.pdf [file NIHMS1632906-supplement-5.pdf]
